# Supplementary material for: Thioether-based recyclable metal–organic frameworks for selective and efficient removal of Hg2+ from water
Source: Royal Society of Chemistry journal article supplement (doi:10.1039/c9dt03714d), 2019-01-01
Supplement: c9dt03714d1.pdf [file c9dt03714d1.pdf]

## Supporting Information

### Thioether-Based Recyclable Metal Organic Frameworks for Selective and Efficient Removal of Hg<sup>2+</sup> from Water

Kan Li<sup>a</sup>, Jing-jing Li<sup>a</sup>, Ni Zhao<sup>a</sup>, Ting-ting Xie<sup>a</sup>, Bin Di<sup>\* a,b</sup>, Li-li Xu<sup>\* a,b</sup>

<sup>a</sup> Jiangsu Key Laboratory of Drug Design and Optimization, China Pharmaceutical University, Nanjing 210009, China.

<sup>b</sup> Key Laboratory of Drug Quality Control and Pharmacovigilance, Ministry of Education, China Pharmaceutical University, Nanjing 210009, China.

\*Corresponding authors: [dibin@cpu.edu.cn](mailto:dibin@cpu.edu.cn) (B.D.); [1620174420@cpu.edu.cn](mailto:1620174420@cpu.edu.cn) (L.L.X.)

## Table of Contents

| No. | Contents                                                                                                                            | Pages |
|-----|-------------------------------------------------------------------------------------------------------------------------------------|-------|
| 1   | <b>Fig. S1</b> <sup>1</sup> H NMR spectra of 1,3,5-tris(bromomethyl)-2,4,6-trimethoxybenzene                                        | 3     |
| 2   | <b>Fig. S2</b> <sup>1</sup> H NMR spectra of 1,3,5-tris((pyridin-4-ylthio)methyl)benzene ( <i>L</i> <sub>1</sub> )                  | 4     |
| 3   | <b>Fig. S3</b> <sup>1</sup> H NMR spectra of 2,4,6-trimethoxy-1,3,5-tris((pyridin-4-ylthio)methyl)benzene ( <i>L</i> <sub>2</sub> ) | 5     |
| 4   | <b>Fig. S4</b> HRMS of 2,4,6-trimethoxy-1,3,5-tris((pyridin-4-ylthio)methyl)benzene ( <i>L</i> <sub>2</sub> )                       | 6     |
| 5   | <b>Fig. S5</b> Thermogravimetric curves of MOFs <b>1-3</b>                                                                          | 7     |
| 6   | <b>Fig. S6</b> The amount of metal ions released by MOFs <b>1-3</b> in different solutions                                          | 8     |
| 7   | <b>Table S1</b> Selected bond distances (Å) and angles (°) for complexes <b>1-3</b>                                                 | 9     |

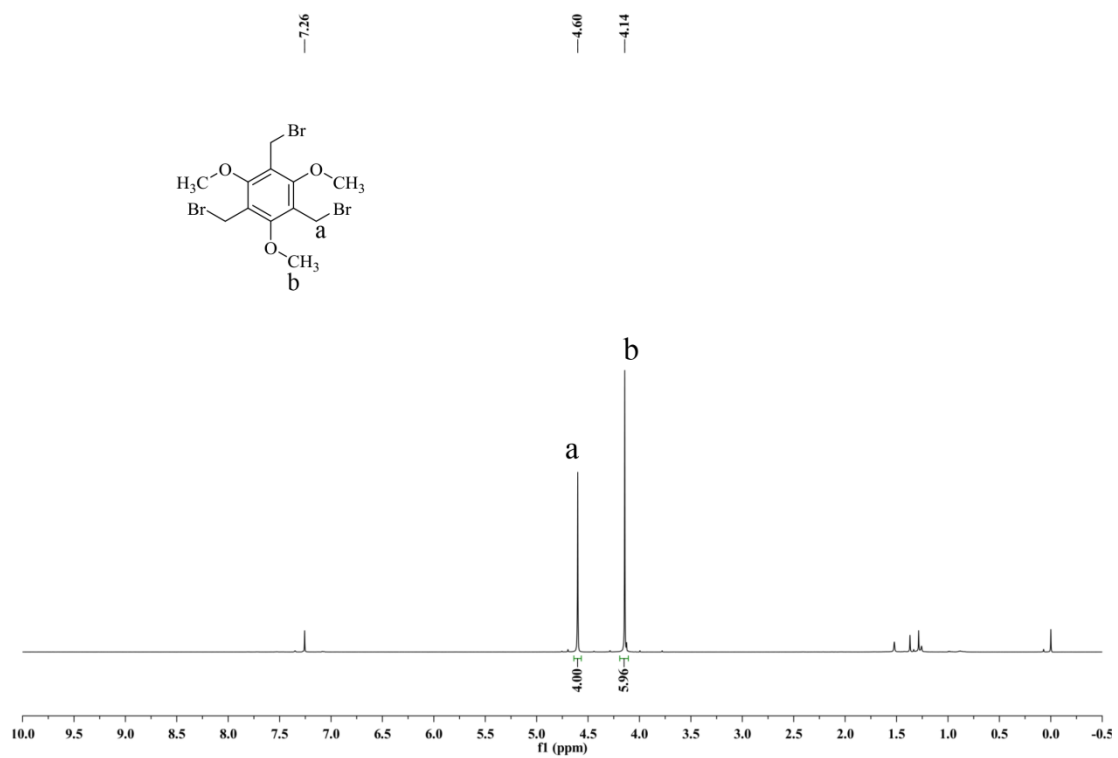

Fig. S1 <sup>1</sup>H NMR spectra of 1,3,5-tris(bromomethyl)-2,4,6-trimethoxybenzene

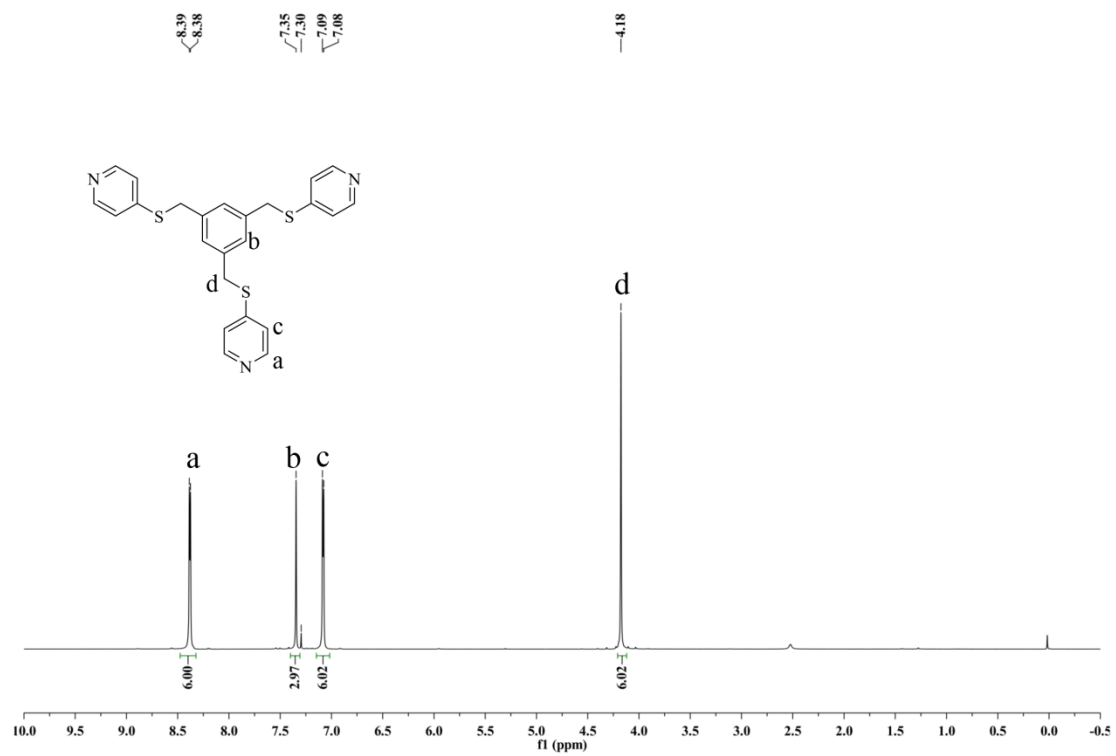

Fig. S2  $^1\text{H}$  NMR spectra of 1,3,5-tris((pyridin-4-ylthio)methyl)benzene ( $L_1$ )

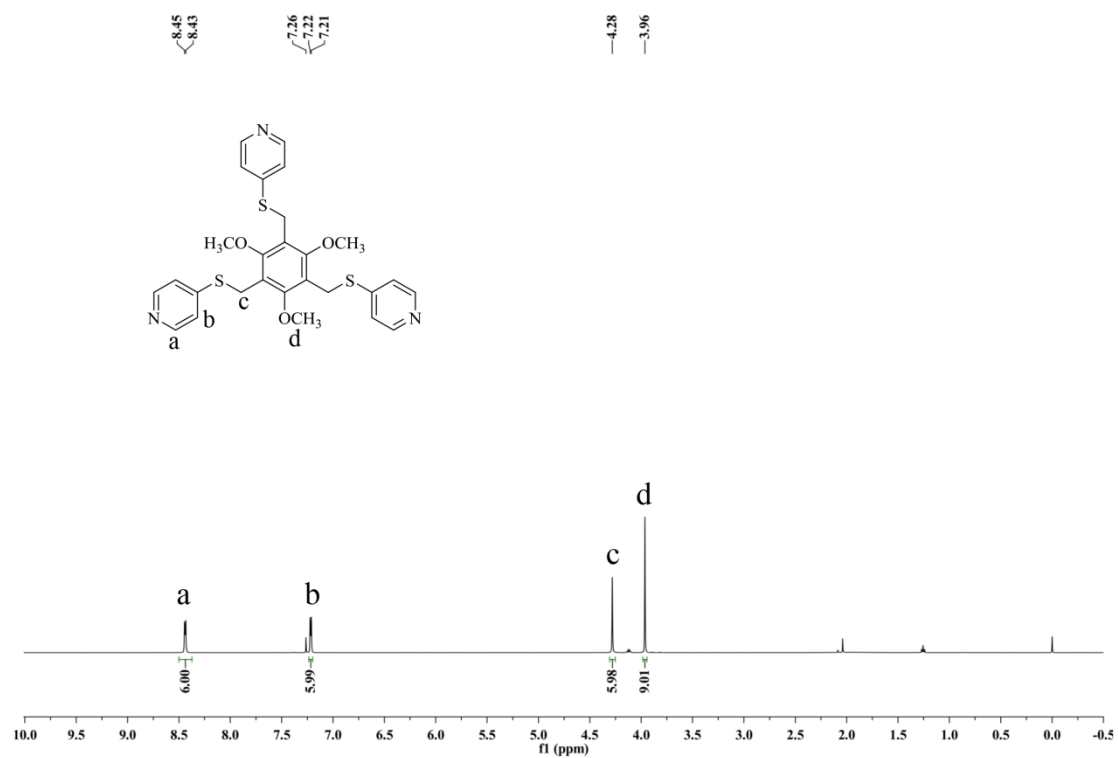

**Fig. S3**  $^1\text{H}$  NMR spectra of 2,4,6-trimethoxy-1,3,5-tris((pyridin-4-ylthio)methyl)benzene ( $L_2$ )

1:MS(+) RT:0.250 Scan:#151

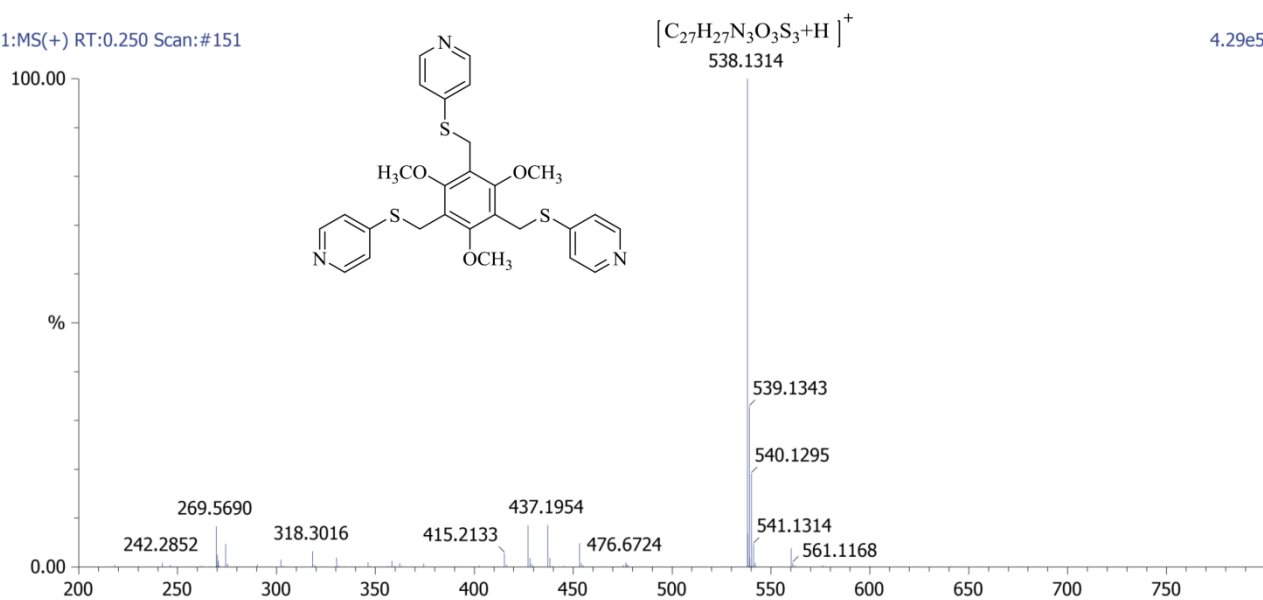

Fig. S4 HRMS of 2,4,6-trimethoxy-1,3,5-tris((pyridin-4-ylthio)methyl)benzene ( $L_2$ )

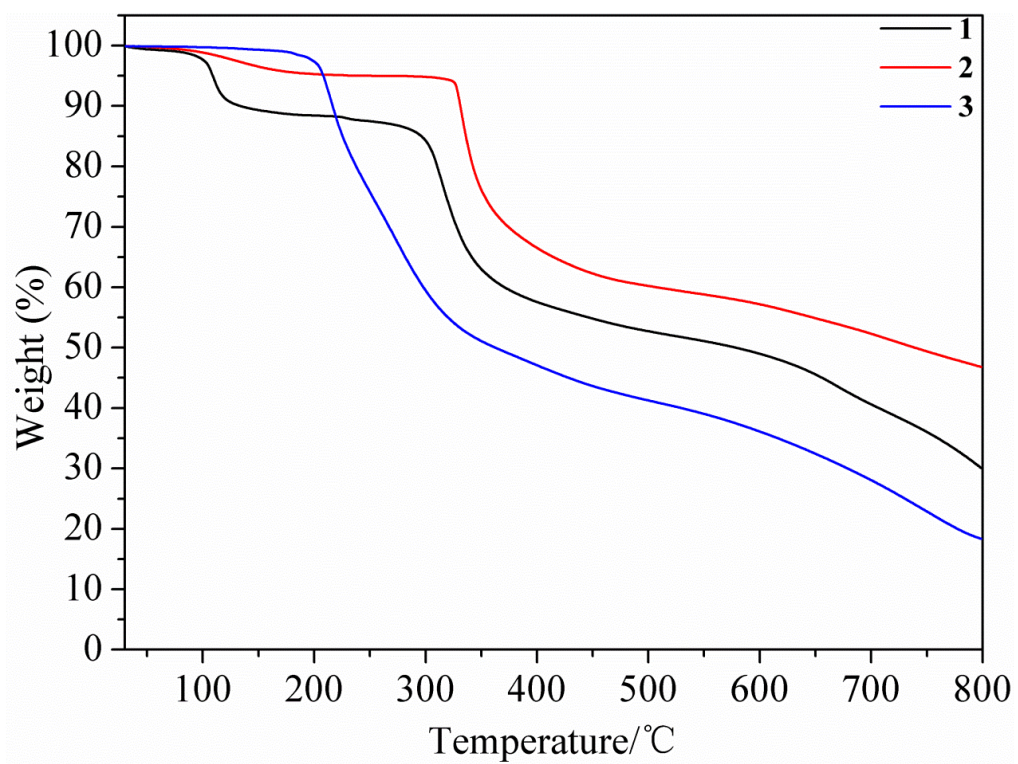

Fig. S5 Thermogravimetric curves of MOFs 1-3

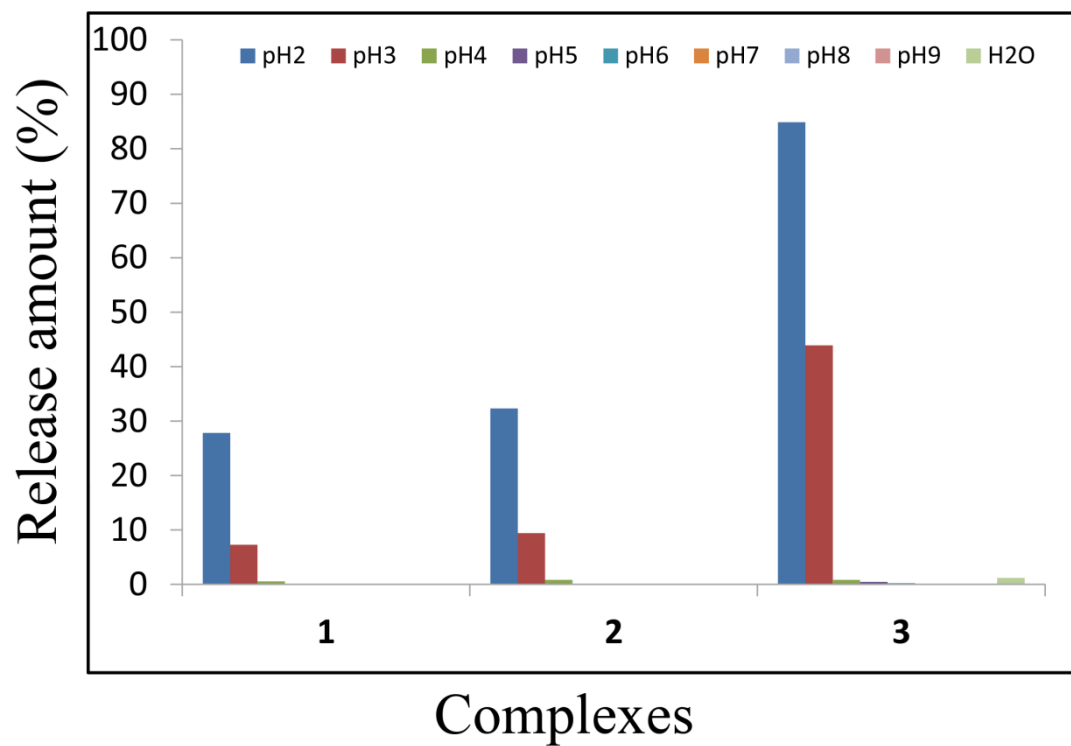

Fig. S6 The amount of metal ions released by MOFs 1-3 in different solutions



**Table S1.** Selected bond distances (Å) and angles (°) for complexes 1-3

| <b>1</b>       |            |              |            |              |            |
|----------------|------------|--------------|------------|--------------|------------|
| Zn1–Cl1        | 2.2440(11) | Zn1–Cl2      | 2.2114(12) |              |            |
| Zn1–N1         | 2.037(3)   | Zn1–N3       | 2.029(3)   |              |            |
| Cl2–Zn1–Cl1    | 121.02(5)  | N1–Zn1–Cl1   | 105.02(9)  | N1–Zn1–Cl2   | 105.47(9)  |
| N3–Zn1–Cl1     | 108.31(10) | N3–Zn1–Cl2   | 108.44(10) | N3–Zn1–N1    | 107.90(13) |
| <b>2</b>       |            |              |            |              |            |
| I1–Cu2         | 2.656(2)   | I1–Cu1       | 2.624(3)   | I1–O2        | 2.09(2)    |
| I1–O3          | 2.37(2)    | I2–Cu2       | 2.577(2)   | I2–Cu1       | 3.065(3)   |
| I2–O1          | 2.34(2)    | I2–Cu3       | 2.2325(10) | I3–Cu2       | 2.960(3)   |
| I3–Cu1         | 2.571(2)   | I3–Cu3       | 2.3154(10) | I3–O4        | 2.00(2)    |
| Cu2–Cu1        | 2.408(3)   | Cu2–N3       | 1.975(12)  | Cu1–N1       | 1.954(13)  |
| Cu1–Cu3        | 2.548(2)   |              |            |              |            |
| Cu1–I1–Cu2     | 54.26(7)   | O2–I1–Cu2    | 77.4(6)    | O2–I1–Cu1    | 106.6(6)   |
| O2–I1–O3       | 177.3(8)   | O3–I1–Cu2    | 101.2(5)   | O3–I1–Cu1    | 74.2(5)    |
| Cu2–I2–Cu1     | 49.61(6)   | O1–I2–Cu1    | 147.7(6)   | Cu3–I2–Cu1   | 54.82(4)   |
| Cu3–I2–O1      | 139.2(5)   | Cu1–I3–Cu2   | 51.02(6)   | Cu3–I3–Cu1   | 62.61(6)   |
| O4–I3–Cu2      | 156.7(7)   | O4–I3–Cu1    | 125.2(6)   | I1–Cu2–I3    | 99.62(7)   |
| I2–Cu2–I1      | 109.99(8)  | I2–Cu2–I3    | 99.68(8)   | Cu1–Cu2–I1   | 62.19(8)   |
| Cu1–Cu2–I2     | 75.81(9)   | Cu1–Cu2–I3   | 56.11(7)   | N3–Cu2–I1    | 116.7(4)   |
| N3–Cu2–I2      | 119.3(4)   | N3–Cu2–I3    | 108.0(4)   | N3–Cu2–Cu1   | 161.4(4)   |
| I1–Cu1–I2      | 97.48(7)   | I3–Cu1–I1    | 111.52(8)  | I3–Cu1–I2    | 97.14(8)   |
| Cu2–Cu1–I1     | 63.55(8)   | Cu2–Cu1–I2   | 54.58(7)   | Cu2–Cu1–I3   | 72.87(8)   |
| N1–Cu1–I1      | 119.5(4)   | N1–Cu1–I2    | 107.6(4)   | N1–Cu1–I3    | 118.3(4)   |
| N1–Cu1–Cu2     | 161.5(4)   | N1–Cu1–Cu3   | 137.4(4)   | Cu3–Cu1–I1   | 99.09(7)   |
| Cu3–Cu1–I2     | 45.73(5)   | Cu3–Cu1–I3   | 53.78(5)   |              |            |
| <b>3</b>       |            |              |            |              |            |
| Br01–Cu03      | 2.541(5)   | Br02–Cu03    | 2.442(2)   | Cu03–N1      | 2.015(12)  |
| Cu03–N2        | 2.037(11)  | Cu03–N3      | 2.101(12)  | Cu03–Br      | 2.99(4)    |
| Br02–Cu03–Br01 | 120.81(13) | Br02–Cu03–Br | 114.4(5)   | N1–Cu03–Br01 | 95.6(4)    |
| N1–Cu03–Br02   | 90.4(3)    | N1–Cu03–N2   | 171.4(5)   | N1–Cu03–N3   | 83.2(5)    |
| N1–Cu03–Br     | 92.0(5)    | N2–Cu03–Br01 | 91.8(4)    | N2–Cu03–Br02 | 89.5(3)    |
| N2–Cu03–N3     | 90.6(4)    | N2–Cu03–Br   | 95.9(5)    | N3–Cu03–Br01 | 105.7(4)   |
| N3–Cu03–Br02   | 133.4(3)   | N3–Cu03–Br   | 111.8(6)   |              |            |
